# Supplementary material for: Leaf defense capacity of Japanese elm (Ulmus davidiana var. japonica) seedlings subjected to a nitrogen loading and insect herbivore dynamics in a free air ozone-enriched environment
Source: Springer Nature journal article supplement (doi:10.1007/s11356-019-06918-w), 2019-12-16
Supplement: MOESM1 [file 11356_2019_6918_MOESM1_ESM.docx]

**Supplenemtal data of “Leaf defense capacity of Japanese elm (Ulmus davidiana var. japonica) seedlings subjected to a nitrogen loading and insect herbivore dynamics in a free air ozone-enriched environment”, in Environmental Science and Pollution Research**

**Fig. 1S**. Photos of leaf beetle (*Pyrrhalta maculicollis*, *A*), elm sawfly (*Arge captiva*, *B*) grazing on Japanese elm seedlings and elm sawfly eggs oviposited on elm plants (*C*) in free air ozone enrichment system (O3-FACE) plots.


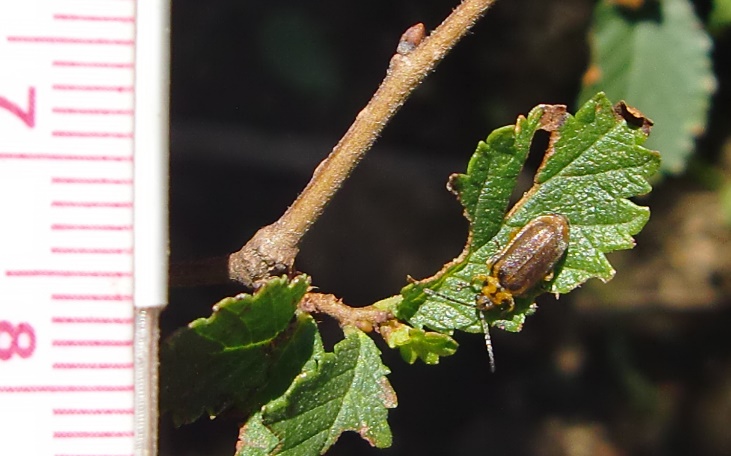

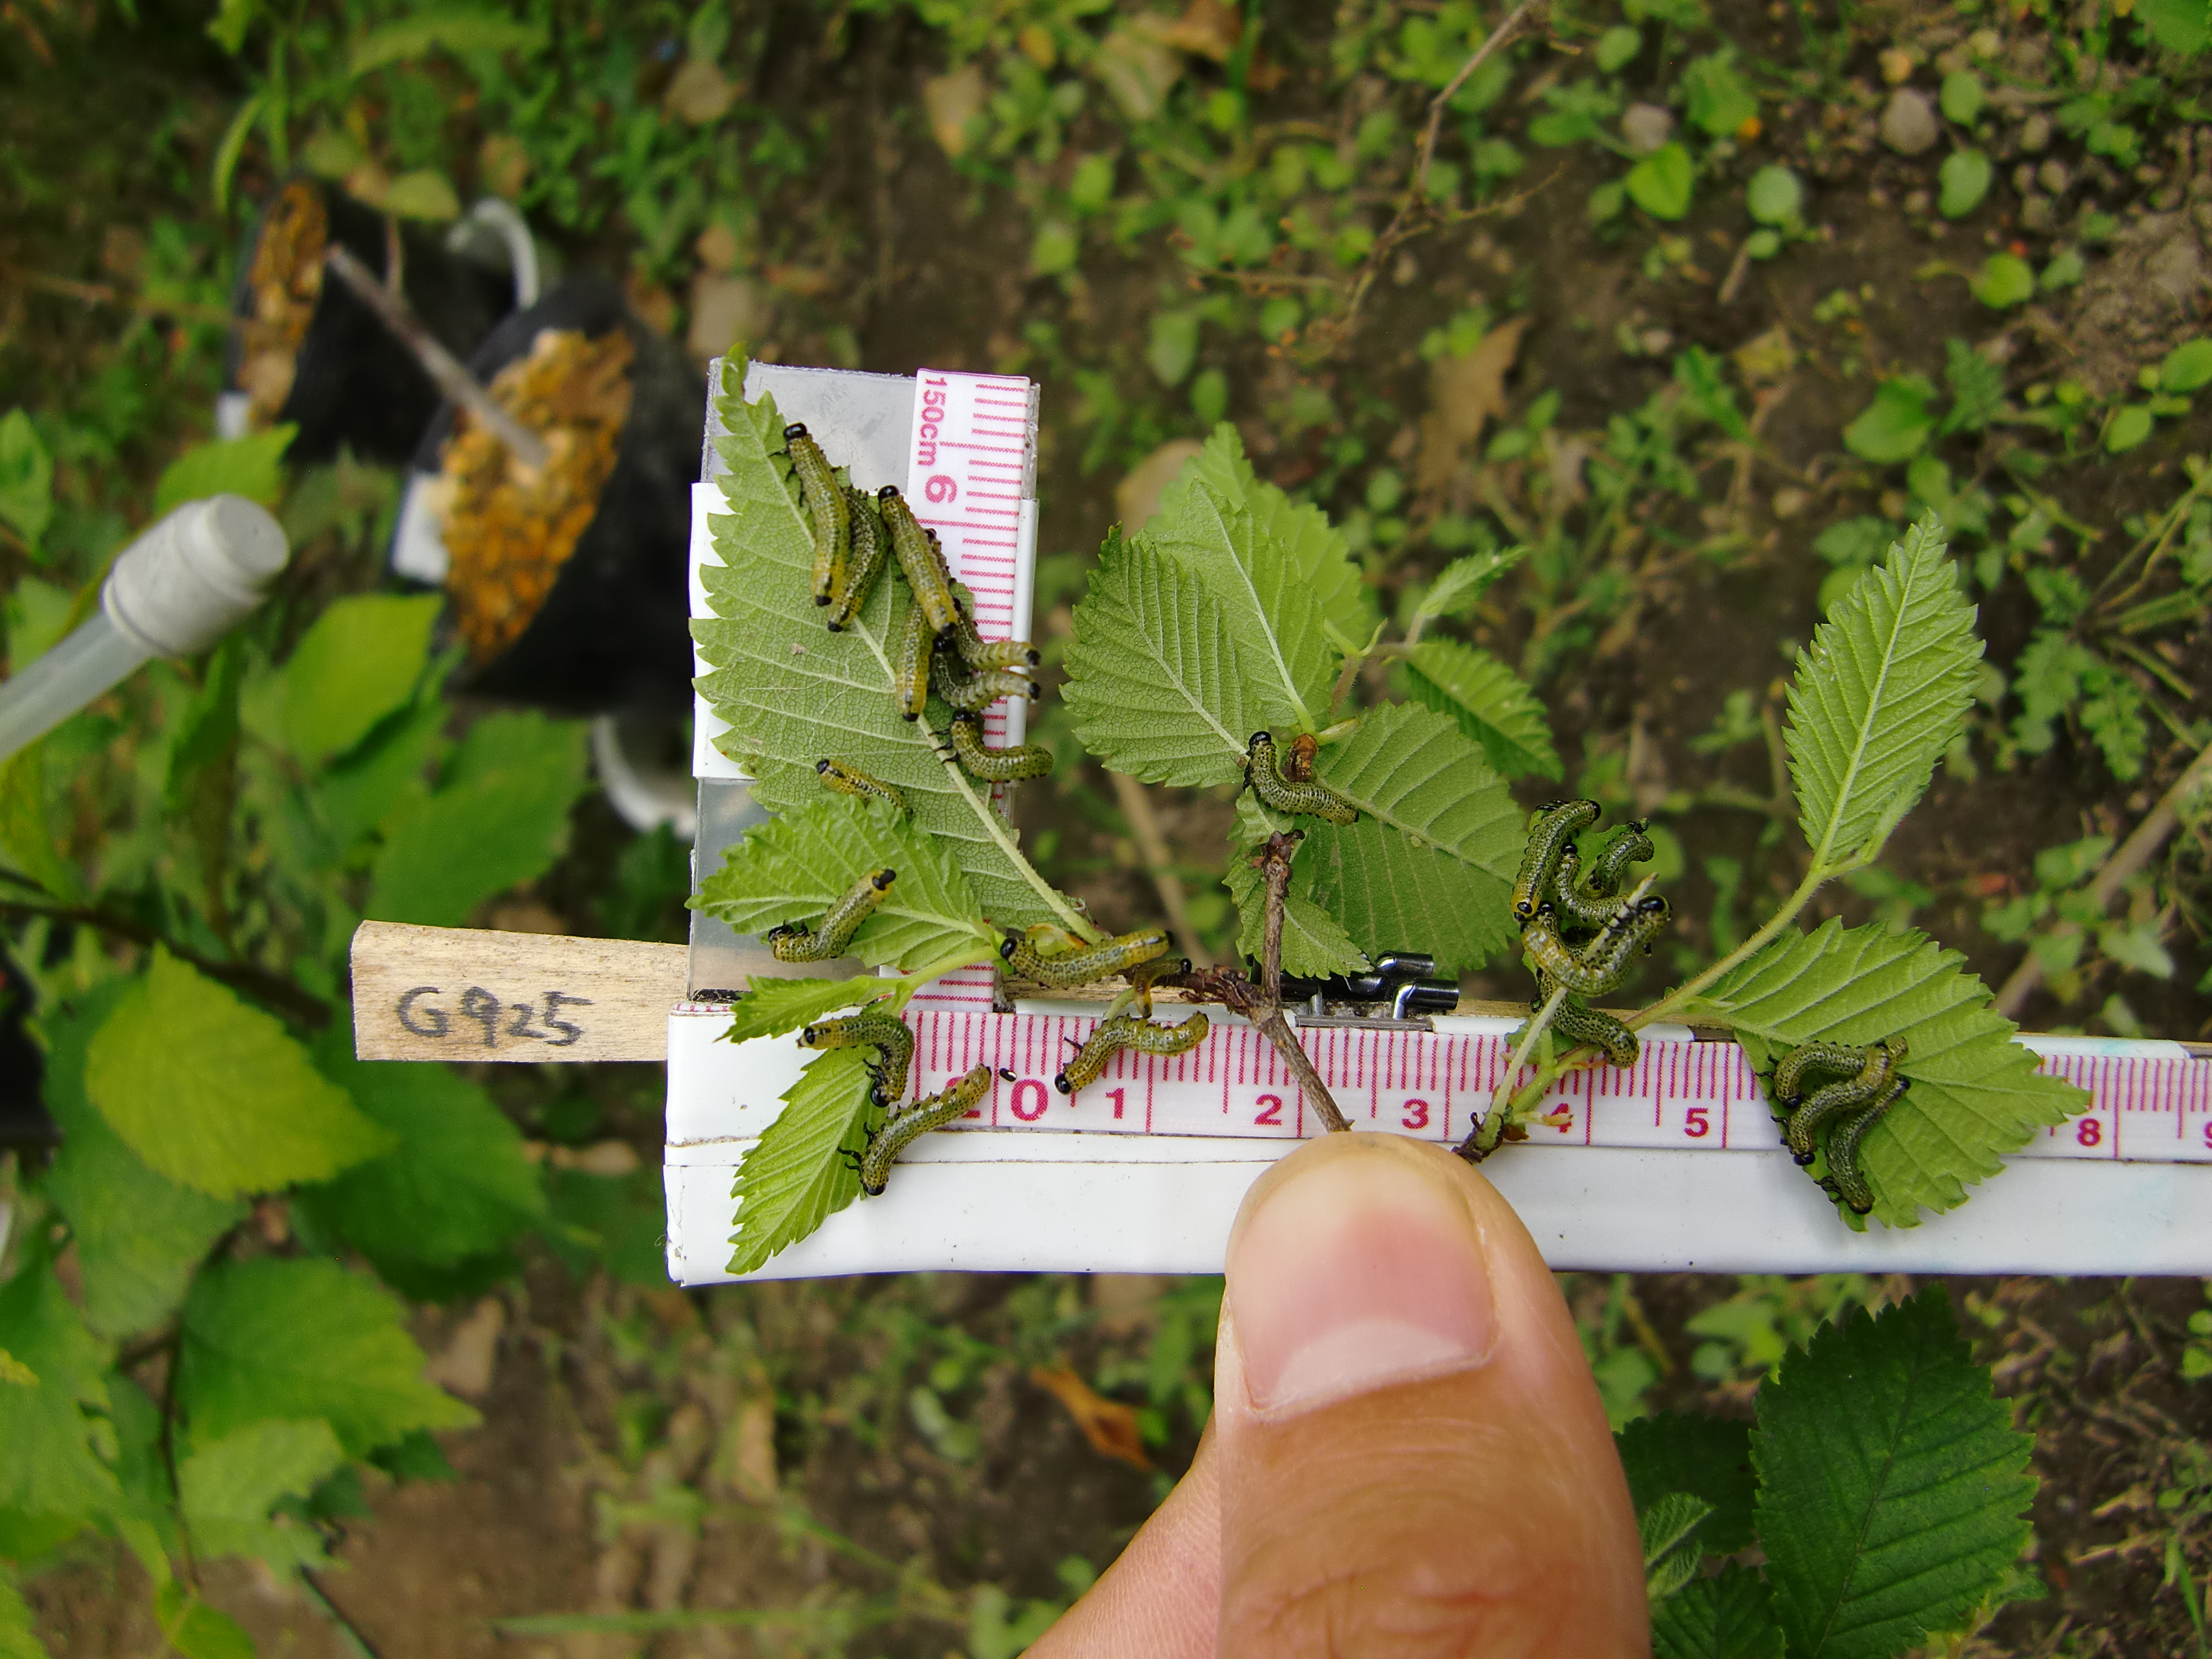

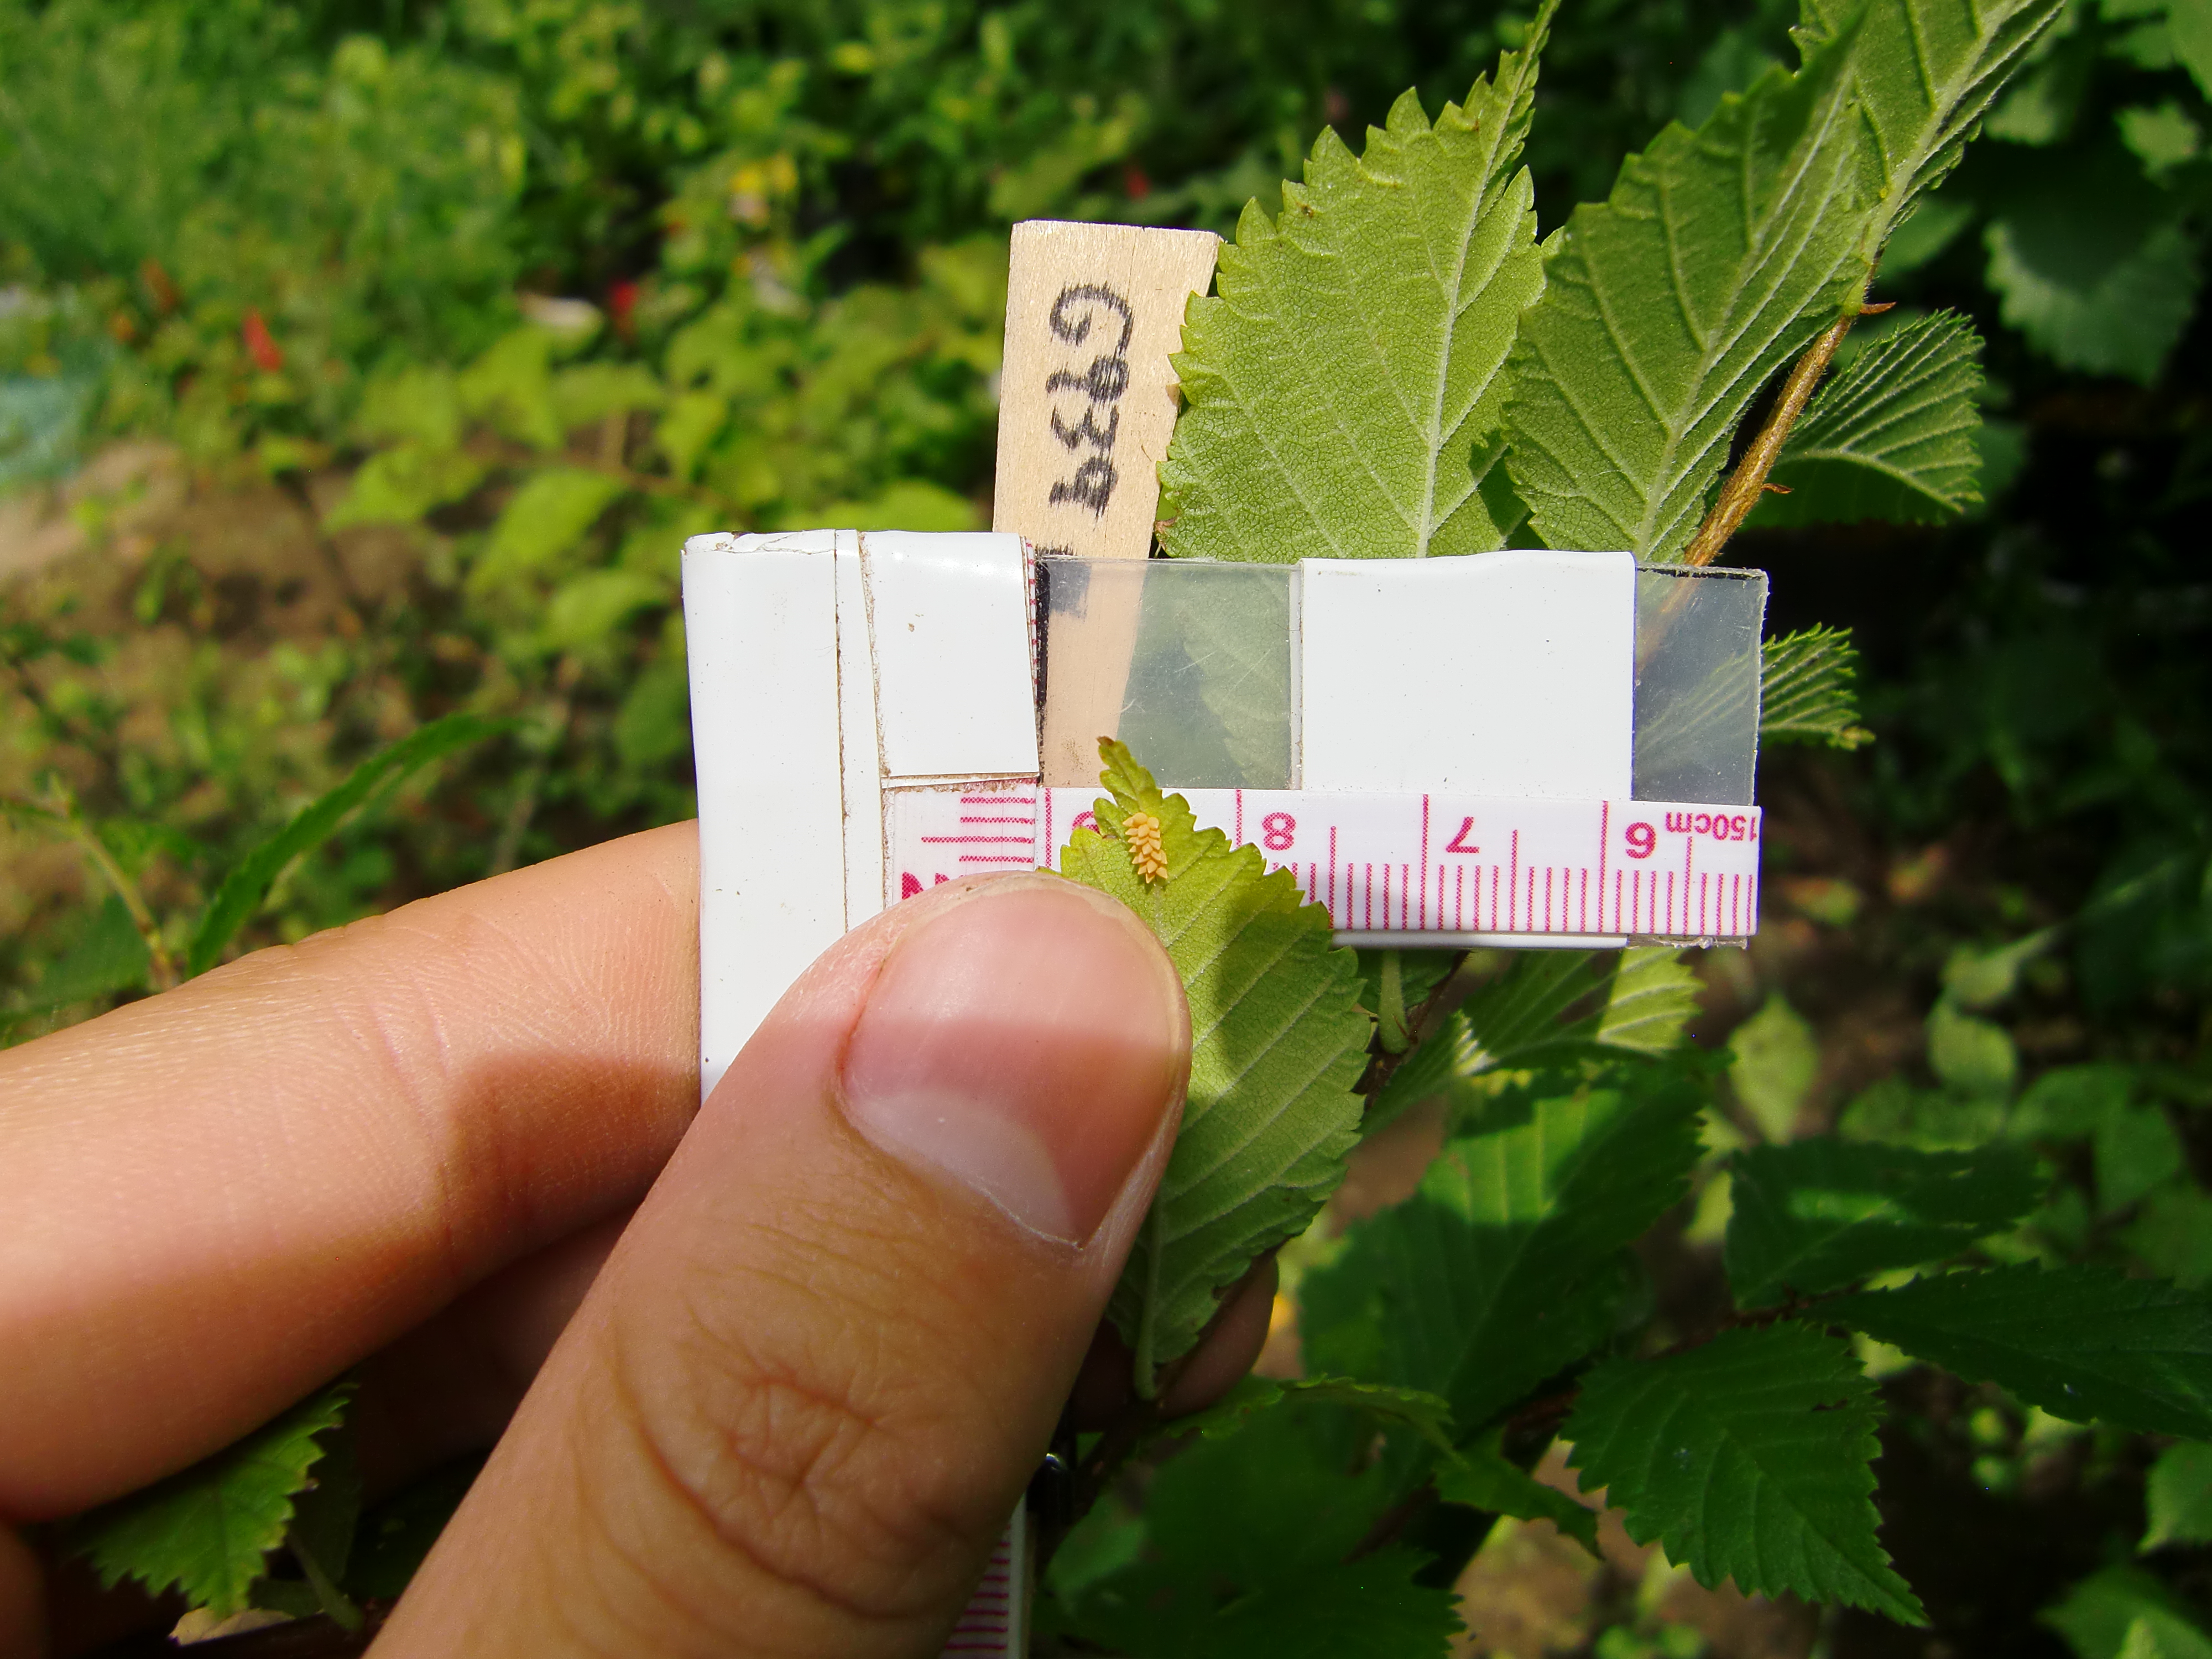


***A***

***B***

***C***

**Fig. 2S**.

Means (±SE) of the total leaf number where elm sawfly eggs oviposited on elm plants were observed treated with 0 (N0) or 50 (N50) kg N ha-1 yr-1 (given as (NH4)2SO4) and ambient (AOZ) or elevated (EOZ) ozone. The data were analyzed by General Linear Model (GLM) at a level of significance *α*=0.05.
